# Supplementary material for: Novel construction of carbon nanofiber/CuCrO2 composite for selective determination of 4-nitrophenol in environmental samples and for supercapacitor application
Source: Royal Society of Chemistry journal article supplement (doi:10.1039/d1ra02783b), 2021-01-01
Supplement: d1ra02783b1.pdf [file d1ra02783b1.pdf]

## Supporting information

### **Novel Construction of Carbon Nanofiber/CuCrO<sub>2</sub> Composite for Selective Determination of 4-Nitrophenol in Environmental Samples and Supercapacitor Applications**

**Subramanian Sakthinathan<sup>a\*</sup>, Ramachandran Rajakumaran<sup>b</sup>, Arjunan Karthi Keyan<sup>a</sup>, Chia-Fang Wu<sup>a</sup>, Sivaramakrishnan Vinothini<sup>c</sup>, Shen-Ming Chen<sup>b</sup>, Te-Wei Chiu<sup>a\*</sup>**

<sup>a</sup>Department of Materials and Mineral Resources Engineering, National Taipei University of Technology, No. 1, Section 3, Chung-Hsiao East Road, Taipei 106, Taiwan.

<sup>b</sup>Department of Chemical Engineering and Biotechnology, National Taipei University of Technology, No. 1, Section 3, Chung-Hsiao East Road, Taipei 106, Taiwan.

<sup>c</sup>Department of Computer Science and Information Engineering, National Taipei University of Technology, No. 1, Section 3, Chung-Hsiao East Road, Taipei 106, Taiwan.

Corresponding author: Email: [sakthinathan1988@gmail.com](mailto:sakthinathan1988@gmail.com) (S. Sakthinathan)

[tewei@ntut.edu.tw](mailto:tewei@ntut.edu.tw) (Te-Wei Chiu)

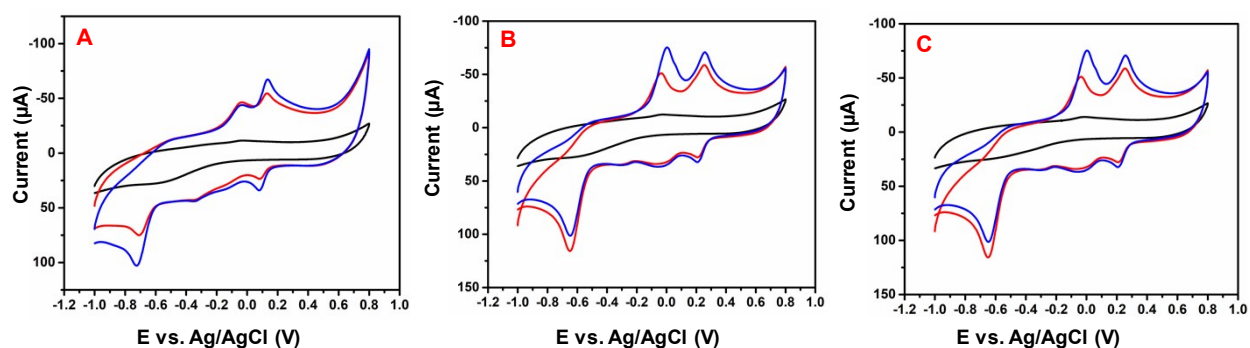

S Figure 1. 4-NP real sample analysis of tap water (A), industrial waste water (B) and River water (C) over the GCE/CNF/CuCrO<sub>2</sub> electrode.

**S. Table 1. Comparison of the specific capacitance values of different oxide systems.**

| S. No | Electrode materials | Specific capacitance (Fg <sup>-1</sup> ) | Current density (Ag <sup>-1</sup> ) or Scan rate | Electrolyte | Reference |
|-------|---------------------|------------------------------------------|--------------------------------------------------|-------------|-----------|
|       |                     |                                          |                                                  |             |           |

|   |                                              |                       |                         |                                         |           |
|---|----------------------------------------------|-----------------------|-------------------------|-----------------------------------------|-----------|
| 1 | CNF/CuCrO <sub>2</sub>                       | 159                   | 5                       | 1M KOH                                  | This work |
| 2 | CuO                                          | 158                   | 5 mVs <sup>-1</sup>     | 1M Na <sub>2</sub> SO <sub>4</sub>      | 1         |
| 3 | TiO <sub>2</sub> NR                          | 85                    | 5 mVs <sup>-1</sup>     | 1 M Na <sub>2</sub> SO <sub>4</sub>     | 2         |
| 4 | MgO–MWCNT/AC                                 | 66                    | 2.2 A g <sup>-1</sup>   | 1 M<br>LiPF <sub>6</sub> /DMC           | 3         |
| 5 | SnO <sub>2</sub> –RuO <sub>2</sub> composite | 150 F g <sup>-1</sup> | 0.005 A g <sup>-1</sup> | 0.5 M<br>H <sub>2</sub> SO <sub>4</sub> | 4         |

## References

1. A. Pendashteh, M. S. Rahmanifar, M. F. Mousavi, Morphologically controlled preparation of CuO nanostructures under ultrasound irradiation and their evaluation as pseudocapacitor bmaterials, *Ultrason. Sonochem*, 21, **2014**, 643-652.
2. A Ramadoss., S. J. Kim, Vertically aligned TiO<sub>2</sub> nanorod arrays for electrochemical supercapacitor. *Journal of alloys and compounds*, 561, **2013**, 262-267.
3. K. Karthikeyan, S. Amaresh, V. Aravindan, Y. S. Lee, Microwave assisted green synthesis of MgO-carbon nanotube composites as electrode material for high power and energy density supercapacitors, *J. Mater. Chem. A*, 1, **2013**, 4105-4111.
4. S. N. Pusawale, P.R. Deshmukh, J.L. Gunjekar, C.D. Lokhande, SnO<sub>2</sub>-RuO<sub>2</sub> composite films by chemical deposition for supercapacitor application. *Mater. Chem. Phys.* **2013**, 139, 416-422.
